# Supplementary material for: Cavity Closure of 2-Hydroxypropyl-&beta;-cyclodextrin: Replica Exchange Molecular Dynamics Simulations
Source: Preprints.org preprint supplement (doi:10.20944/preprints201901.0097.v1), 2019-01-10
Supplement: Supplementary file 1 [file supplementary]

**Supplementary Materials**

Cavity Closure of 2-Hydroxypropyl-β-cyclodextrin: Replica Exchange Molecular Dynamics Simulations

Khanittha Kerdpol 1, Jintawee Kicuntod 2, Peter Wolschann 2,3,4, Seiji Mori 5, Chompoonut Rungnim 6, Manaschai Kunaseth 6, Hisashi Okumura 7, Nawee Kungwan 1,8,*and Thanyada Rungrotmongkol 2,9,10,*

1 Department of Chemistry, Faculty of Science, Chiang Mai University, Chiang Mai 50200, Thailand; khanittha.view@gmail.com and naweekung@gmail.com

2 Structural and Computational Biology Research Unit, Department of Biochemistry, Faculty of Science, Chulalongkorn University, Bangkok 10330, Thailand; jintawee.ki@gmail.com and thanyada.r@chula.ac.th

3 Department of Pharmaceutical Chemistry, University of Vienna, Vienna 1090, Austria; karl.peter.wolschann@univie.ac.at

4 Institute of Theoretical Chemistry, University of Vienna, Vienna 1090, Austria; karl.peter.wolschann@univie.ac.at

5 Institute of Quantum Beam Science, Graduate School of Science and Engineering, Ibaraki University, 2-1-1 Bunkyo, Mito, Ibaraki 310-8512, Japan; seiji.mori.compchem@vc.ibaraki.ac.jp

6 National Nanotechnology Center (NANOTEC), National Science and Technology Development Agency (NSTDA), Pathum Thani 12120, Thailand; chompoonut@nanotec.or.th and manaschai@nanotec.or.th

7 Research Center for Computational Science, Institute for Molecular Science, Okazaki, Aichi 444-8585, Japan; hokumura@ims.ac.jp

8 Center of Excellence in Materials Science and Technology, Chiang Mai University, Chiang Mai 50200, Thailand; naweekung@gmail.com

9 Ph.D. Program in Bioinformatics and Computational Biology, Faculty of Science, Chulalongkorn University, Bangkok 10330, Thailand; thanyada.r@chula.ac.th

10 Molecular Sensory Science Center, Faculty of Science, Chulalongkorn University, 254 Phayathai Road, Patumwan, Bangkok 10330, Thailand; thanyada.r@chula.ac.th

***** Correspondence: naweekung@gmail.com; Tel.: +66-5394-3341 ext. 101. (+66-5389-2277) and thanyada.r@chula.ac.th; Tel.: +66-2218-5426 (+66-2218-5418)


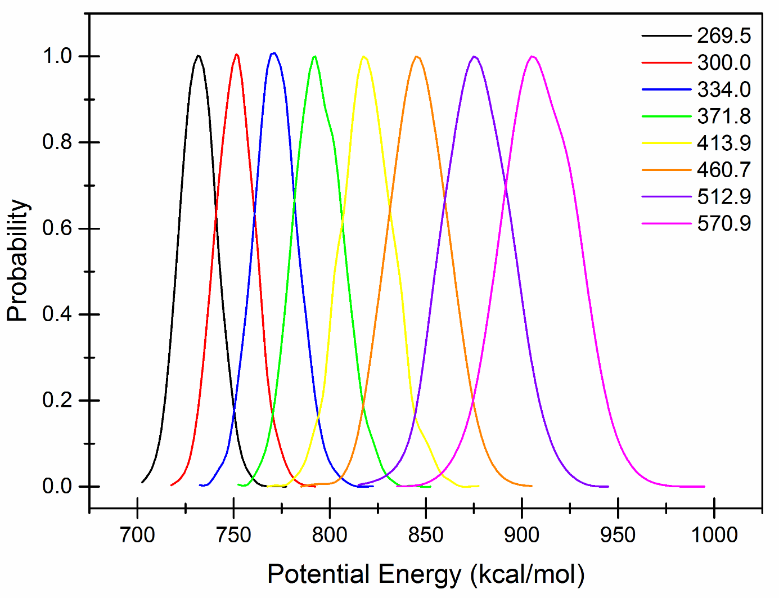


**Figure S1.** The overlapping between the potential energy distributions of each replica temperature ranging from 269.5 K to 570.9 K.


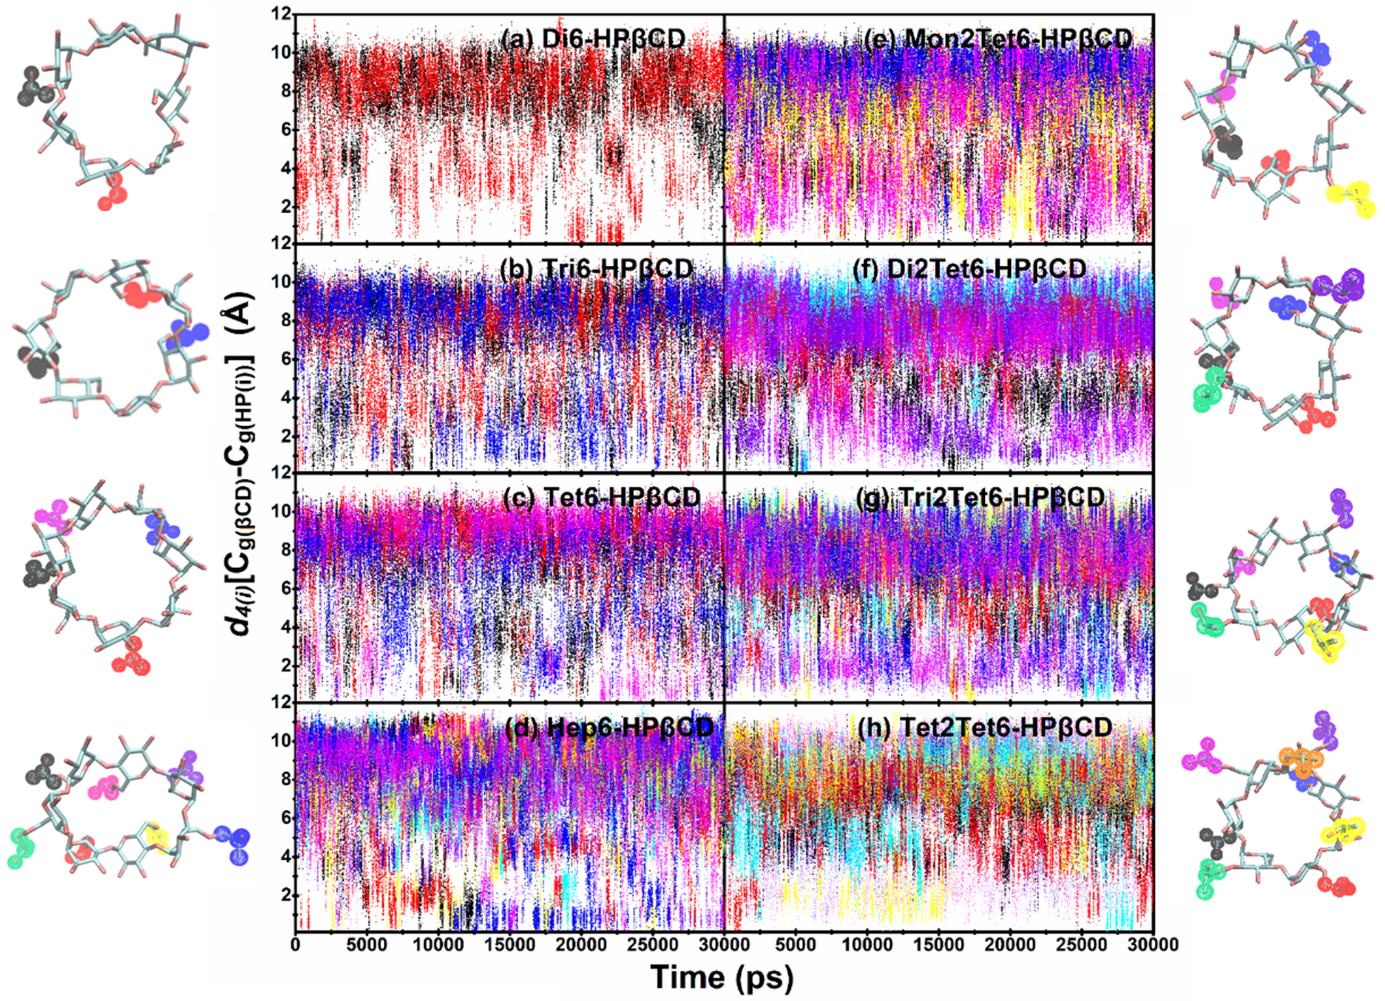


**Figure S2.** The distance of centers of mass between βCD ring and HP group, *d4(i)*[Cg(βCD)-Cg(HP(i))]for (a) Di6-HPβCD, **(**b**)** Tri6**-**HPβCD, **(c)** Tet6-HPβCD, **(**d**)** Hep6-HPβCD, (e) Mon2Tet6-HPβCD, (f) Di2Tet6-HPβCD, (g) Tri2Tet6-HPβCD, and (h) Tet2Tet6-HPβCD at 300 K.


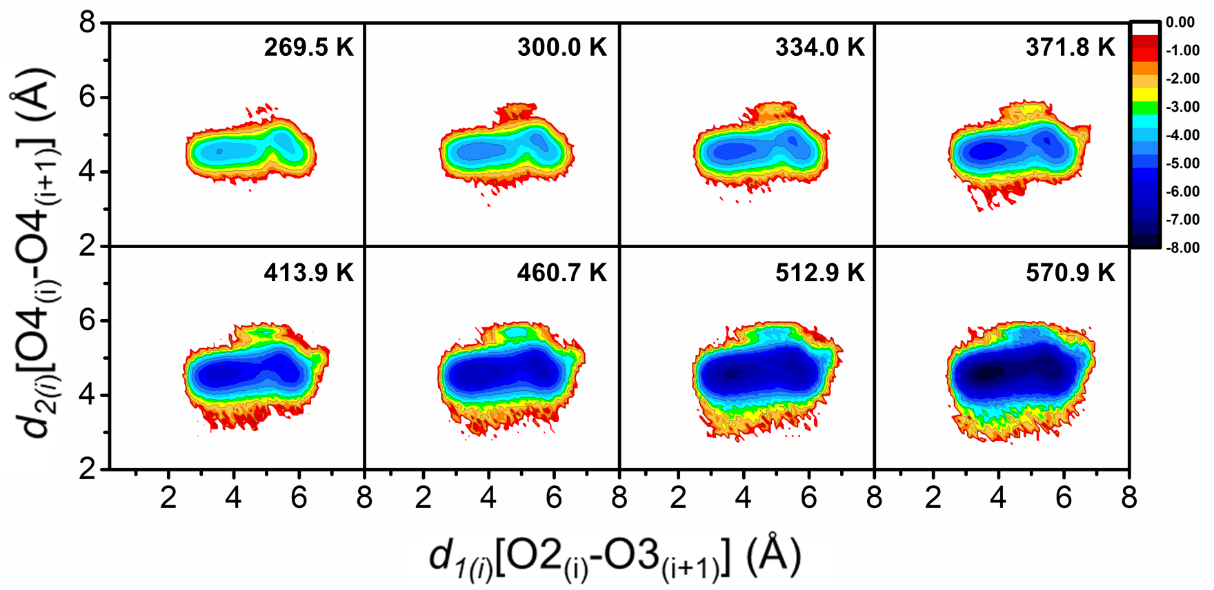


**Figure S3.** Contour graphs of the native βCD probability distribution of 25,000 snapshots with the glycam06 force field at various temperatures.


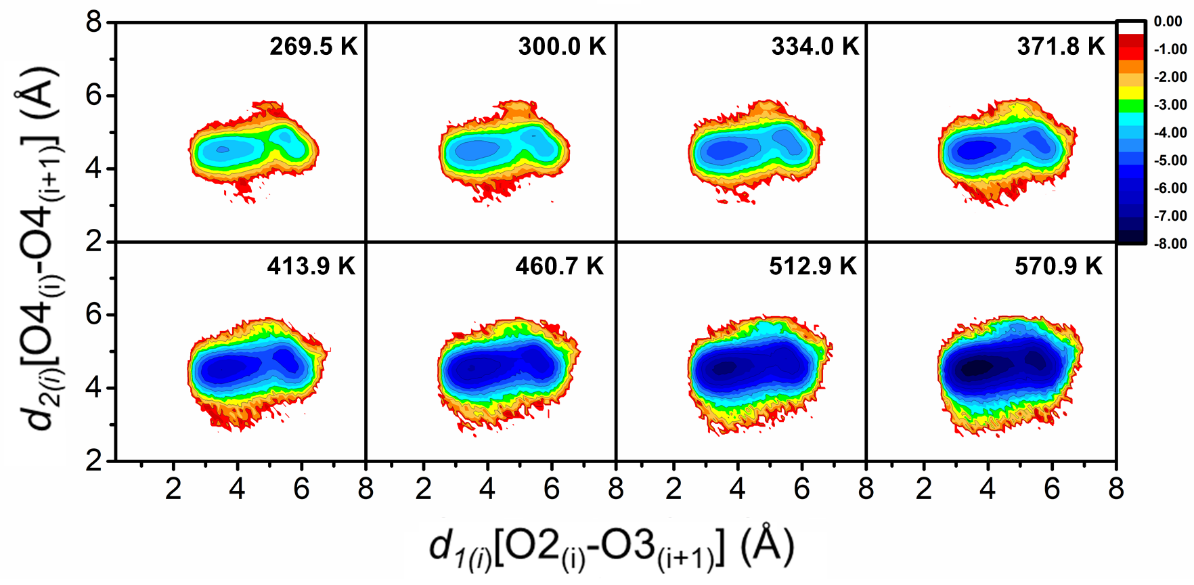


**Figure S4.** Contour graphs of the probability distribution of 25,000 snapshots of Mon6-HPβCD with the glycam06 force field in the various temperatures.


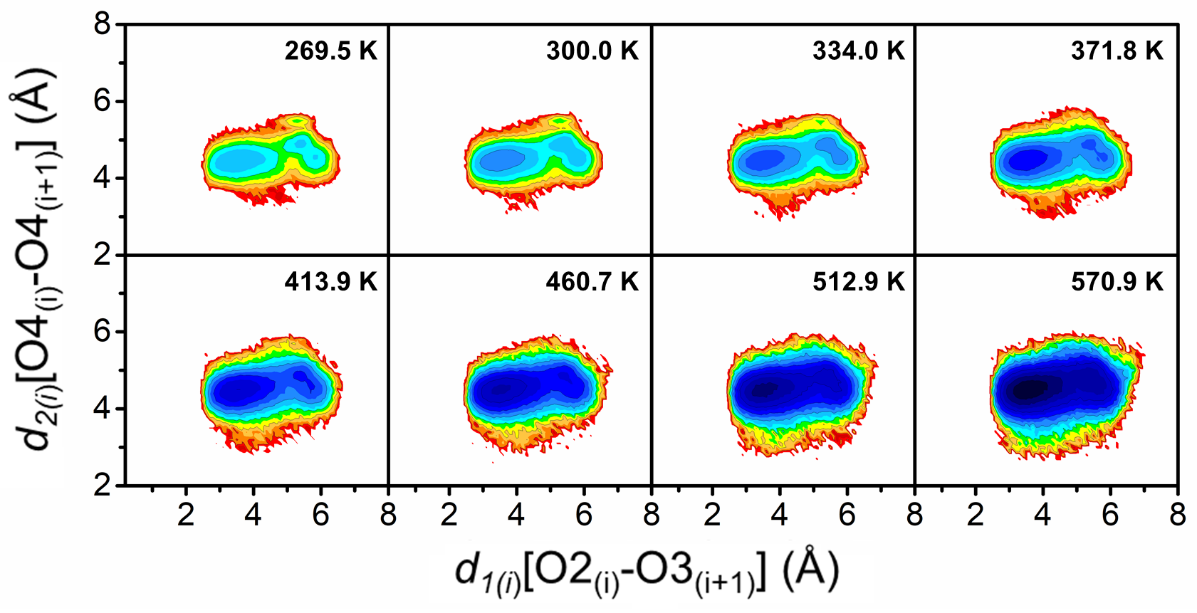


**Figure S5.** Contour graphs of the probability distribution of 25,000 snapshots of Di6-HPβCD with the glycam06 force field in the various temperatures.


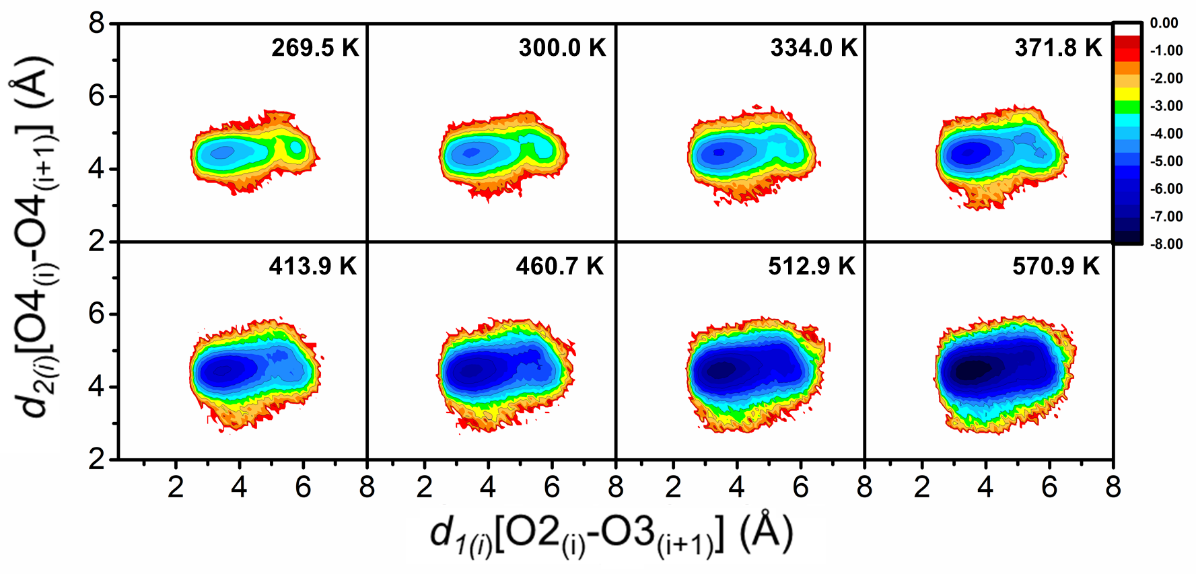


**Figure S6.** Contour graphs of the probability distribution of 25,000 snapshots of Tri6-HPβCD with the glycam06 force field in the various temperatures.


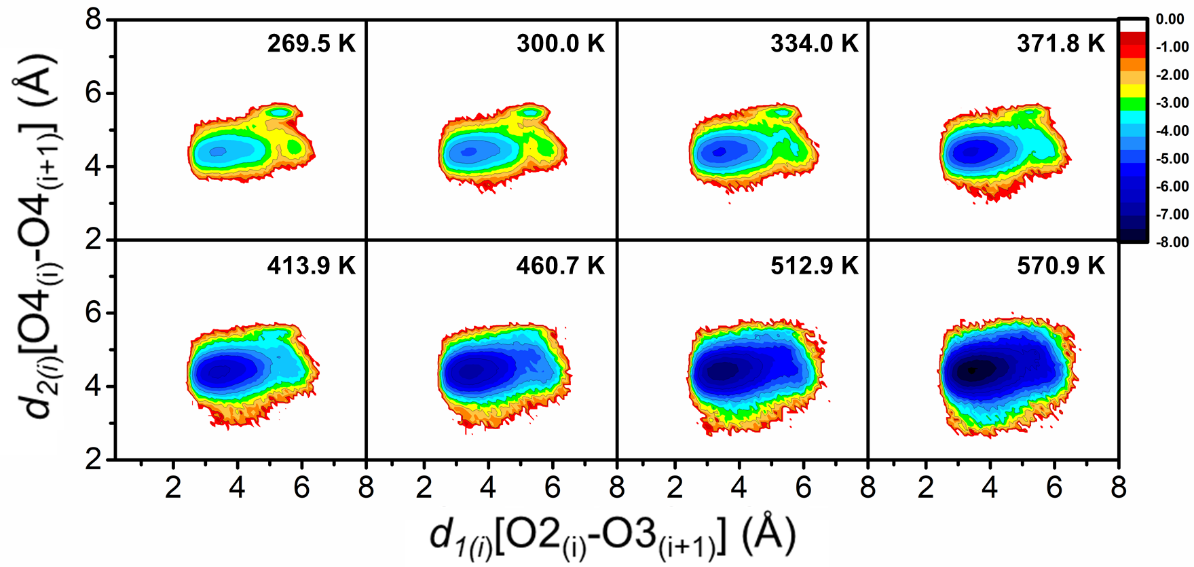


**Figure S7.** Contour graphs of the probability distribution of 25,000 snapshots of Tet6-HPβCD with the glycam06 force field in the various temperatures.


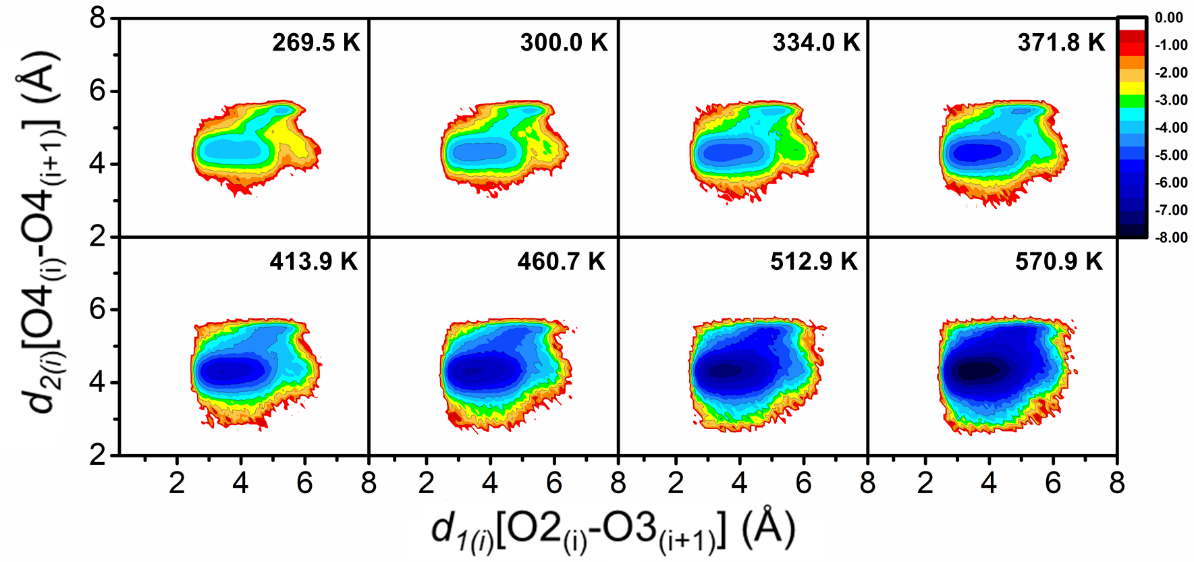


**Figure S8.** Contour graphs of the probability distribution of 25,000 snapshots of Hep6-HPβCD with the glycam06 force field in the various temperatures.


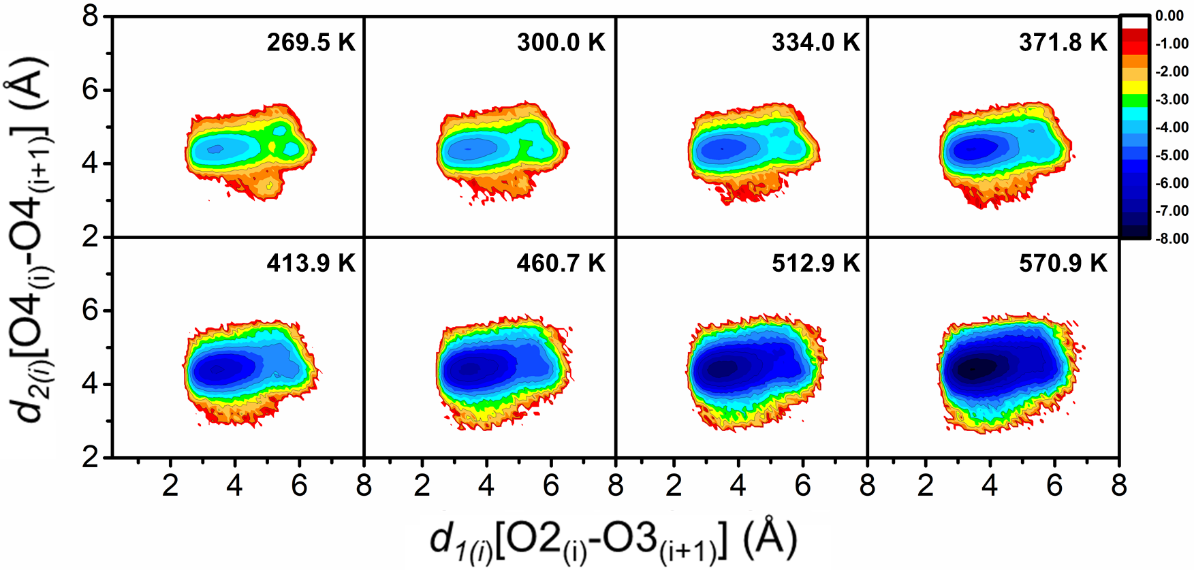


**Figure S9.** Contour graphs of the probability distribution of 25,000 snapshots of Mon2Tet6-HPβCD with the glycam06 force field in the various temperatures.


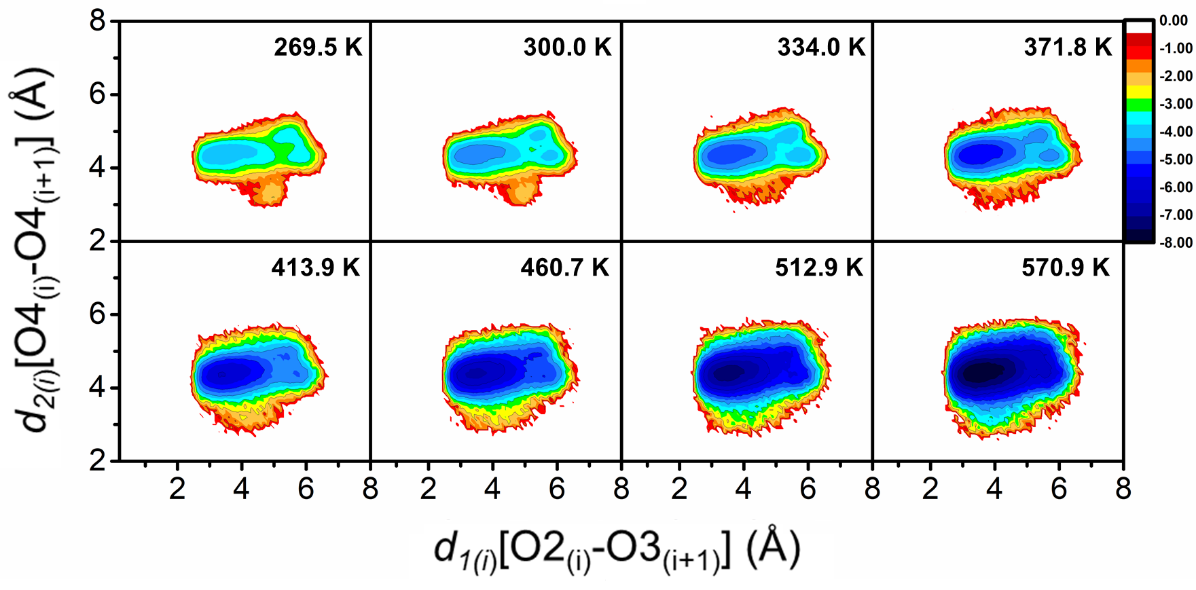


**Figure S10.** Contour graphs of the probability distribution of 25,000 snapshots of Di2Tet6-HPβCD with the glycam06 force field in the various temperatures.


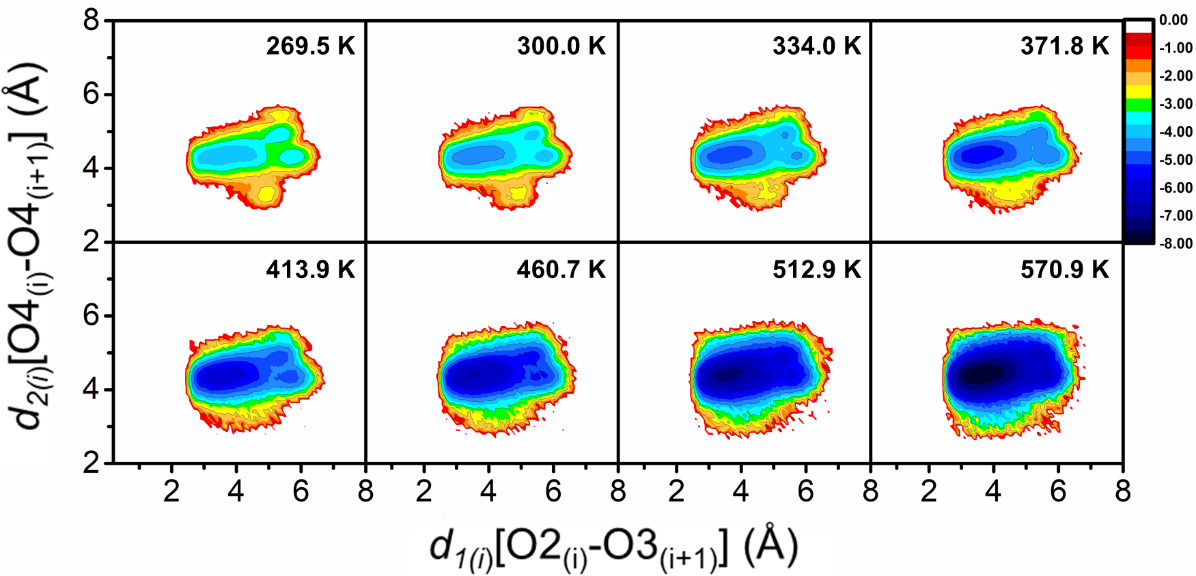


**Figure S11.** Contour graphs of the probability distribution of 25,000 snapshots of Tri2Tet6-HPβCD with the glycam06 force field in the various temperatures.


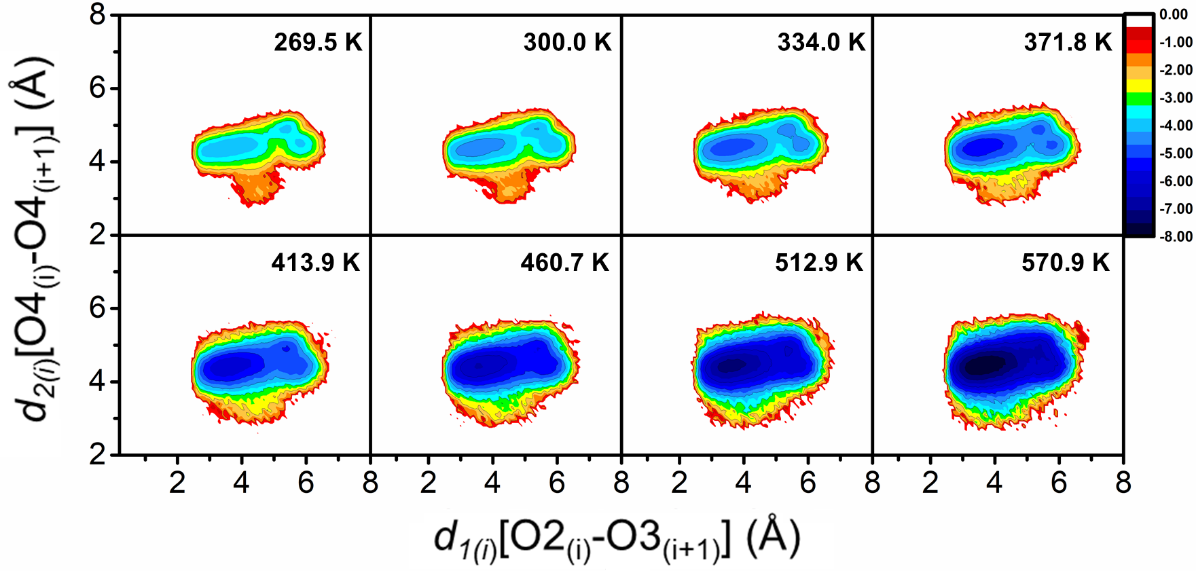


**Figure S12.** Contour graphs of the probability distribution of 25,000 snapshots of Tet2Tet6-HPβCD with the glycam06 force field in the various temperatures.


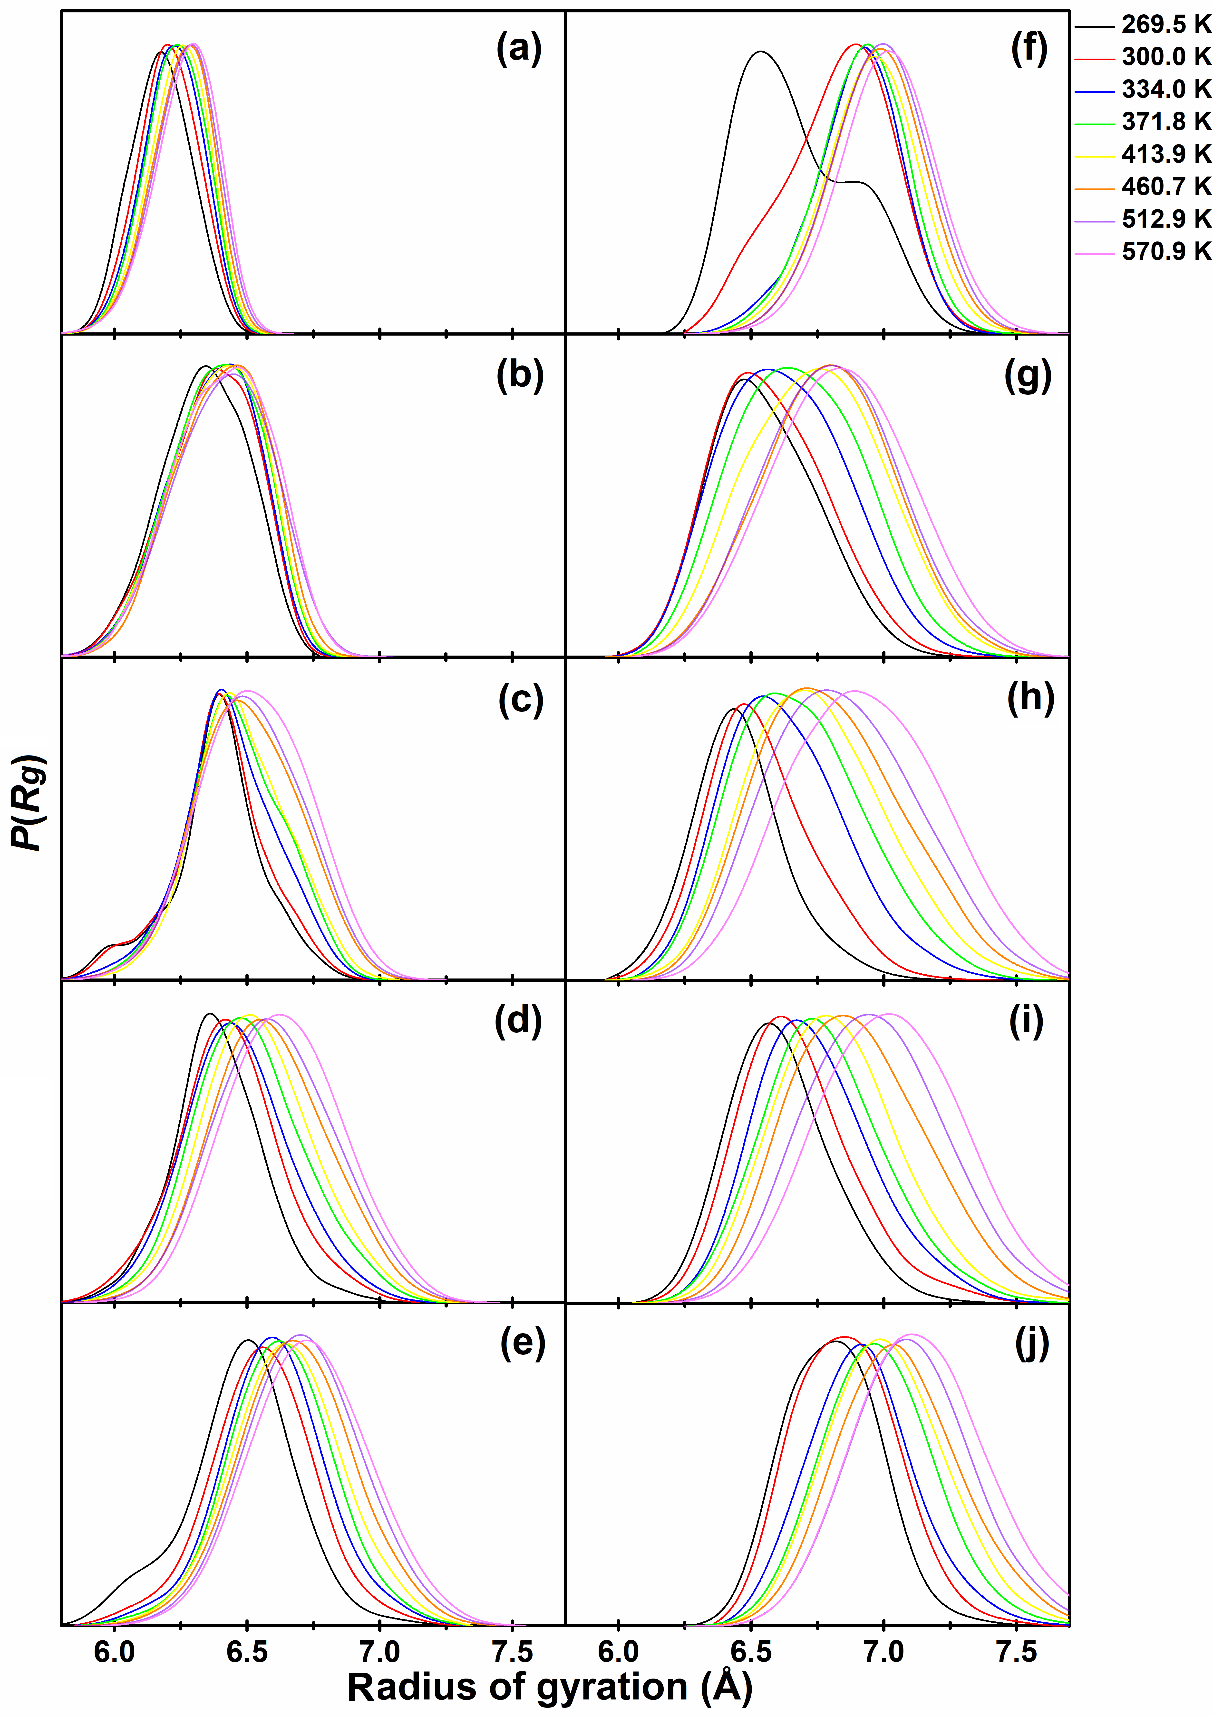


**Figure S13.** The radius of gyration in various temperatures for (a) βCD, (b) Mon6**-**HPβCD, (c)Di6-HPβCD, (d) Tri6-HPβCD, (e) Tet6-HPβCD, (f) Hep6-HPBCD, (g) Mon2Tet6-HPBCD, (h) Di2Tet6-HPBCD, (i) Tri2Tet6-HPBCD, and (j) Tet2Tet6-HPBCD.

**Table S1** The probability of different numbers of flip glucose subunits in βCD and all HPβCDs using flip angle parameter, *θ(i)*[C6(i)-C2(i+1)-C6(i+1)] in the various temperatures (criteria: more value than 90 degree) compared with classical MD simulation in the parenthesis.

| **The percentage of flip angle (%)** | | | | | | | | | | | | |
| --- | --- | --- | --- | --- | --- | --- | --- | --- | --- | --- | --- | --- |
| **Temperature** | **269.5 K** | | | **300.0 K** | | | **334.0 K** | | | **371.8 K** | | |
| **Model** | **No flip** | **One flip** | **Two flips** | **No flip** | **One flip** | **Two flips** | **No flip** | **One flip** | **Two flips** | **No flip** | **One flip** | **Two flips** |
| **βCD** | 52 | 38 | 10 | 58 (28) | 35 (53) | 7 (19) | 61 | 33 | 6 | 59 | 34 | 7 |
| **Single-sided HP substitution** | | | | | | | | | | | | |
| **Mon6-HPβCD** | 65 | 32 | 3 | 69 | 28 | 3 | 68 | 29 | 3 | 67 | 29 | 4 |
| **Di6-HPβCD** | 75 | 23 | 2 | 74 | 23 | 3 | 76 | 22 | 2 | 76 | 22 | 2 |
| **Tri6-HPβCD** | 70 | 29 | 1 | 75 | 24 | 1 | 78 | 21 | 1 | 77 | 21 | 2 |
| **Tet6-HPβCD** | 66 | 33 | 1 | 78 | 21 | 1 | 81 | 18 | 1 | 81 | 18 | 1 |
| **Hep6-HPβCD** | 43 | 54 | 3 | 73 (84) | 25 (15) | 2 (1) | 81 | 18 | 1 | 79 | 19 | 2 |
| **Double-sided HP substitution** | | | | | | | | | | | | |
| **Mon2Tet6-HPβCD** | 77 | 21 | 2 | 77 | 22 | 1 | 77 | 22 | 1 | 74 | 24 | 2 |
| **Di2Tet6-HPβCD** | 67 | 32 | 1 | 75 | 24 | 1 | 78 | 20 | 2 | 78 | 20 | 2 |
| **Tri2Tet6-HPβCD** | 67 | 31 | 2 | 70 | 28 | 2 | 71 | 26 | 3 | 68 | 28 | 2 |
| **Tet2Tet6-HPβCD** | 74 | 23 | 3 | 74 | 24 | 2 | 74 | 24 | 2 | 73 | 24 | 3 |
| **Temperature** | **413.9 K** | | | **460.7 K** | | | **512.9 K** | | | **570.9 K** | | |
| **Model** | **No flip** | **One flip** | **Two flips** | **No flip** | **One flip** | **Two flips** | **No flip** | **One flip** | **Two flips** | **No flip** | **One flip** | **Two flips** |
| **βCD** | 63 | 30 | 7 | 63 | 30 | 7 | 62 | 31 | 7 | 61 | 32 | 7 |
| **Single-sided HP substitution** | | | | | | | | | | | | |
| **Mon6-HPβCD** | 65 | 30 | 5 | 65 | 30 | 5 | 64 | 30 | 6 | 61 | 32 | 7 |
| **Di6-HPβCD** | 73 | 24 | 3 | 71 | 26 | 3 | 66 | 29 | 5 | 65 | 29 | 6 |
| **Tri6-HPβCD** | 76 | 21 | 3 | 73 | 24 | 3 | 68 | 28 | 4 | 64 | 30 | 6 |
| **Tet6-HPβCD** | 78 | 20 | 2 | 76 | 21 | 3 | 73 | 24 | 3 | 67 | 28 | 5 |
| **Hep6-HPβCD** | 77 | 21 | 2 | 73 | 23 | 4 | 69 | 26 | 5 | 64 | 30 | 6 |
| **Double-sided HP substitution** | | | | | | | | | | | | |
| **Mon2Tet6-HPβCD** | 74 | 24 | 2 | 73 | 24 | 3 | 70 | 26 | 4 | 65 | 29 | 6 |
| **Di2Tet6-HPβCD** | 76 | 22 | 2 | 72 | 25 | 3 | 69 | 27 | 4 | 66 | 29 | 5 |
| **Tri2Tet6-HPβCD** | 68 | 29 | 3 | 68 | 28 | 4 | 68 | 28 | 4 | 66 | 29 | 5 |
| **Tet2Tet6-HPβCD** | 72 | 25 | 3 | 70 | 27 | 3 | 67 | 29 | 4 | 65 | 30 | 5 |

**Table S2** The probability of 25,000 snapshots with different numbers of HP occupied in CD cavity **(**criteria: *d4(i)***[**Cg(βCD)**-**Cg(HP(i))] < 3 Å) for all HPβCDsin the various temperatures.

| **The probability of different numbers of *d4(i)*[Cg(βCD)-Cg(HP(i))] < 3 Å (%)** | | | | | | | | | |
| --- | --- | --- | --- | --- | --- | --- | --- | --- | --- |
| **Model** | ***n*(HPinserted)** | **Temperature (K)** | | | | | | | |
| **269.5** | **300.0** | **334.0** | **371.8** | **413.9** | **460.7** | **512.9** | **570.9** |
| **Single-sided HP substitution** | | | | | | | | | |
| **Mon6-HPβCD** | **0** | 96.45 | 97.59 | 97.88 | 97.25 | 97.81 | 98.80 | 98.63 | 98.33 |
| **1** | 3.55 | 2.41 | 2.12 | 2.75 | 2.19 | 1.20 | 1.37 | 1.67 |
| **Di6-HPβCD** | **0** | 84.44 | 86.80 | 91.21 | 93.00 | 94.30 | 94.69 | 95.39 | 96.01 |
| **1** | 15.56 | 13.20 | 8.79 | 7.00 | 5.70 | 5.31 | 4.61 | 3.99 |
| **Tri6-HPβCD** | **0** | 51.92 | 62.69 | 71.25 | 77.77 | 84.25 | 88.56 | 90.54 | 94.16 |
| **1** | 48.06 | 37.25 | 28.72 | 22.22 | 15.75 | 11.44 | 9.44 | 5.84 |
| **2** | 0.02 | 0.06 | 0.03 | 0.01 | 0.00 | 0.00 | 0.02 | 0.00 |
| **Tet6-HPβCD** | **0** | 46.44 | 61.66 | 68.80 | 74.52 | 77.54 | 83.42 | 87.17 | 89.24 |
| **1** | 53.48 | 38.30 | 31.13 | 25.46 | 22.42 | 16.58 | 12.82 | 10.76 |
| **2** | 0.08 | 0.04 | 0.07 | 0.02 | 0.04 | 0.00 | 0.01 | 0.00 |
| **Hep6-HPβCD** | **0** | 15.14 | 42.41 | 61.04 | 65.90 | 74.98 | 79.94 | 83.04 | 85.76 |
| **1** | 84.59 | 57.45 | 38.88 | 34.06 | 24.99 | 20.02 | 16.92 | 14.21 |
| **2** | 0.27 | 0.14 | 0.08 | 0.04 | 0.03 | 0.04 | 0.04 | 0.03 |
| **Double-sided HP substitution** | | | | | | | | | |
| **Mon2Tet6-HPβCD** | **0** | 42.64 | 44.28 | 51.70 | 58.09 | 67.69 | 72.06 | 76.31 | 79.21 |
| **1** | 57.04 | 54.53 | 47.42 | 41.37 | 31.98 | 27.73 | 23.50 | 20.66 |
| **2** | 1.32 | 1.19 | 0.88 | 0.54 | 0.33 | 0.21 | 0.19 | 0.13 |
| **Di2Tet6-HPβCD** | **0** | 23.51 | 33.40 | 45.25 | 51.01 | 56.64 | 60.77 | 65.14 | 71.96 |
| **1** | 75.37 | 65.36 | 53.95 | 48.22 | 42.68 | 38.77 | 34.46 | 27.75 |
| **2** | 1.12 | 1.24 | 0.80 | 0.77 | 0.68 | 0.46 | 0.40 | 0.29 |
| **Tri2Tet6-HPβCD** | **0** | 21.11 | 26.46 | 34.52 | 39.18 | 43.60 | 53.79 | 60.66 | 67.70 |
| **1** | 77.73 | 72.24 | 64.44 | 59.93 | 55.42 | 45.59 | 38.83 | 31.99 |
| **2** | 1.16 | 1.30 | 1.04 | 0.89 | 0.98 | 0.62 | 0.51 | 0.31 |
| **Tet2Tet6-HPβCD** | **0** | 35.34 | 38.58 | 40.27 | 47.16 | 48.88 | 51.23 | 53.28 | 60.79 |
| **1** | 63.94 | 60.66 | 58.84 | 52.22 | 50.36 | 48.10 | 46.10 | 38.84 |
| **2** | 0.72 | 0.76 | 0.89 | 0.62 | 0.76 | 0.67 | 0.62 | 0.37 |
